# Supplementary material
Source: publisher site journal article supplement (https://www.dovepress.com/article/358138)
Supplement: Supplementary file 1 [file get_supplementary_file.php]

Supporting Information

GOx-functionalized Platelet Membranes-Camouflaging Nanoreactors for Enhanced Multimodal Tumor Treatment

Ying Dua,c, Shujun Wangb, Jianfeng Luanb, Meilin Zhanga,c, Baoan Chen*a,c, Yanfei Shen*c

aDepartment of Hematology and Oncology, Zhongda Hospital, School of Medicine, Southeast University, Nanjing, Jiangsu, China

bDepartment of Blood Transfusion, Jinling Hospital, Nanjing University School of Medicine, Nanjing, Jiangsu, China

c School of Medicine, Southeast University, Nanjing, Jiangsu, China

*These authors contributed equally to this work

**Keywords**

Glucose oxidase, PLT membrane,nanoparticles, tumor microenvironment, tumor treatment

**Address all correspondence to:**

Baoan Chen, Department of Hematology and Oncology, Zhongda Hospital, School of Medicine, Southeast University, Nanjing, Jiangsu 210009, China; Email [cba8888@hotmail.com](mailto:cba8888@hotmail.com)

Yanfei Shen, School of Medicine, Southeast University, Nanjing, Jaingsu 210009, China; Email [Yanfei.Shen@seu.edu.cn](mailto:Yanfei.Shen@seu.edu.cn)


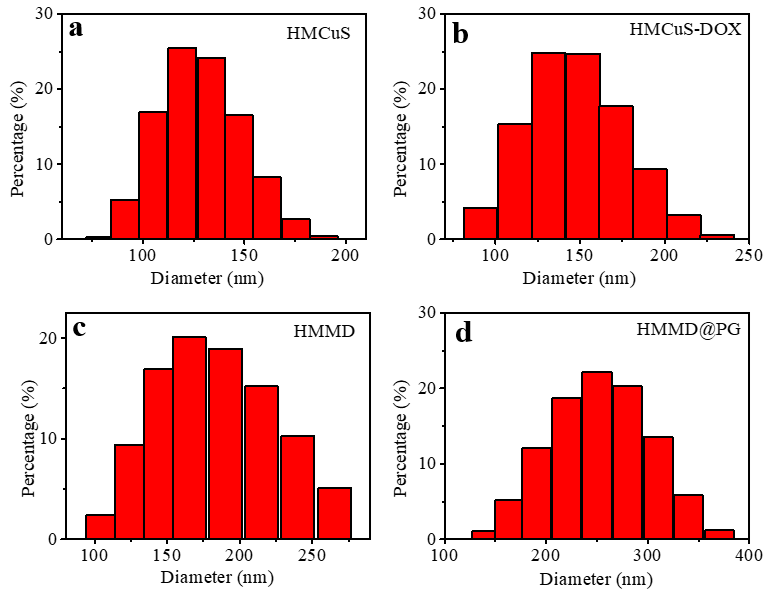


**Figure S1.** (a) The DLS (Dynamic Light Scattering) of HMCuS, (b) HMCuS-DOX, (c) HMMD, and (d) HMMD@PG.


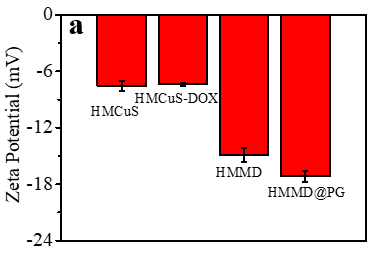


**Figure S2.** (a) The Zeta potential of HMCuS, HMCuS-DOX, HMMD, and HMMD@PG.


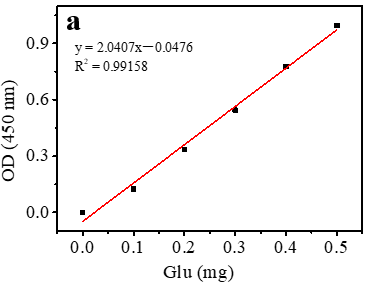


**Figure S3.** (a) The standard calibration curve equation of glucose.


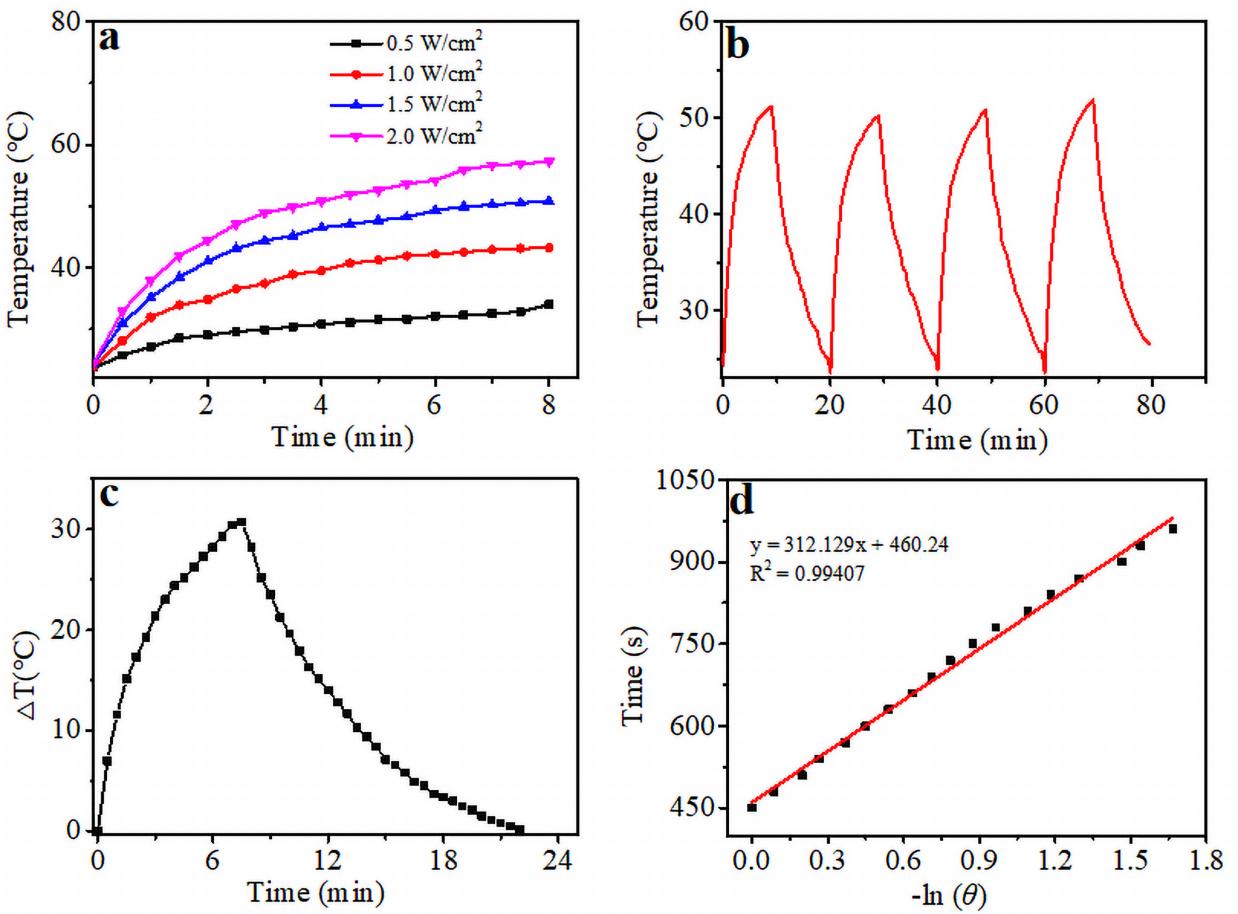


**Figure S4.** (a) Photothermal conversion curves of a suspension of the HMMD@PG (100 µg/mL) under NIR laser irradiation (808 nm) with various power for 8 min. (b) Four on-off cycles photothermal conversion curves of HMMD@PG (100 µg/mL) under NIR laser irradiation (808 nm, 1.5 W/cm2). (c) Temperature increase and decrease curves of HMMD@PG (100 µg/mL) in water by 1.5 W/cm2 808 nm laser for 8 min. (d) Linear time data versus -ln*θ* obtained from the cooling period.


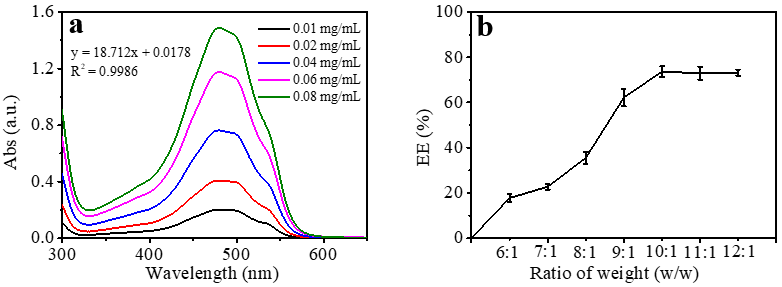


**Figure S5.**(a)The standard UV–vis adsorption curve of different concentrations of DOX in deionized water and the standard calibration curve equation of DOX. (b) The encapsulation efficiency of DOX in HMMD.


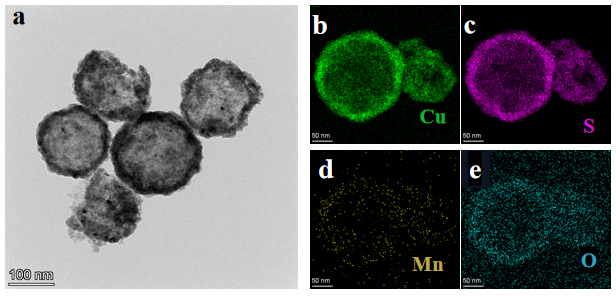


**Figure S6.** (a) The TEM imaging of HMMD mixed with GSH solution (2mM). (b-e) EDS elemental mapping of HMMD mixed with GSH solution (2mM).


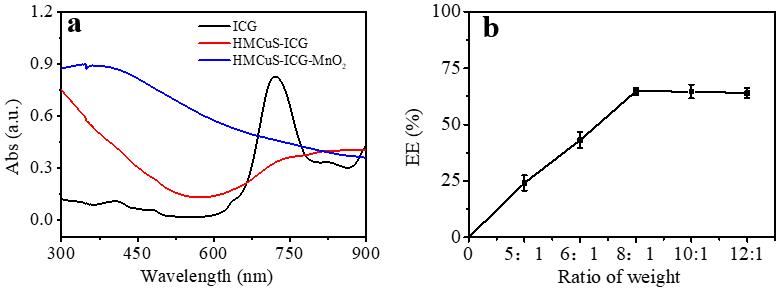


**Figure S7.** (a)The UV–vis adsorption curve of ICG, HMCuS-ICG, and HMCuS-ICG-MnO2. (b) The EE of ICG in HMCuS-ICG-MnO2.


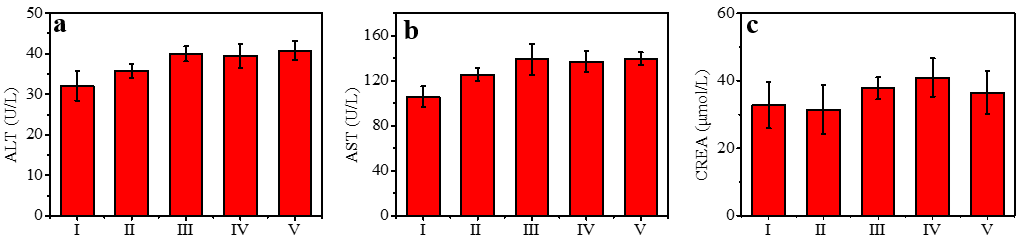


**Figure S8.** (a)The ALT, (b) AST and (c) CREA results of 4T1 tumor bearing mice in different treatment groups over 14 days treatment.

**Table S1.** Quantitative analysis of Mn and Cu obtained from the EDS of the HMMD.

| Element | Atomic Fraction (%) | Atomic Error (%) | Mass Fraction (%) | Mass Error (%) | Fit error (%) |
| --- | --- | --- | --- | --- | --- |
| Mn | 6.36 | 1.26 | 8.55 | 1.39 | 0.69 |
| Cu | 44.04 | 8.69 | 68.49 | 11.13 | 0.20 |
